# Supplementary material for: QuaID: Enabling Earlier Detection of Recently Emerged SARS-CoV-2 Variants of Concern in Wastewater
Source: bioRxiv or medRxiv preprint supplement (doi:10.1101/2021.09.08.21263279), 2022-08-04
Supplement: Supplementary file [file media-1.pdf]

## Supplementary materials

**Supplementary Table 1.** Wastewater treatment plants sampled, abbreviations, average flow rates, service populations, and geographic service areas

| Wastewater treatment plant | Abbreviation | Flowrate, MGD (AVG $\pm$ SD) | Population | Average gal/cap/day | Area, square miles |
|----------------------------|--------------|------------------------------|------------|---------------------|--------------------|
| 69th Street                | 69           | 80.03 $\pm$ 21.77            | 551,150    | 145                 | 96.72              |
| Almeda Sims                | AS           | 13.76 $\pm$ 11.93            | 117,968    | 117                 | 54.93              |
| Beltway                    | BW           | 6.93 $\pm$ 4.70              | 70,900     | 98                  | 9.76               |
| Cedar Bayou                | CD           | 0.78 $\pm$ 0.42              | 1,722      | 453                 | 3.27               |
| Chocolate Bayou            | CB           | 4.03 $\pm$ 4.19              | 37,359     | 108                 | 14.61              |
| Clinton Park               | CP           | 0.69 $\pm$ 0.81              | 3,825      | 180                 | 4.14               |
| Easthaven                  | EH           | 1.89 $\pm$ 1.85              | 16,030     | 118                 | 4.78               |
| FWSD#23                    | 23           | 3.09 $\pm$ 2.52              | 40,689     | 76                  | 15.14              |
| Forest Cove                | FC           | 0.28 $\pm$ 0.13              | 4,170      | 67                  | 2.73               |
| Greenridge                 | GR           | 3.06 $\pm$ 3.06              | 28,742     | 106                 | 6.87               |
| Homestead                  | HO           | 1.58 $\pm$ 1.53              | 9,375      | 169                 | 6.12               |
| Imperial Valley            | IV           | 1.75 $\pm$ 0.70              | 16,804     | 104                 | 2.22               |
| Intercontinental Airport   | IA           | 1.91 $\pm$ 0.63              | 2,408      | 793                 | 38.73              |
| Keegans Bayou              | KB           | 14.25 $\pm$ 10.31            | 124,000    | 115                 | 13.78              |
| Kingwood Central           | KW           | 3.49 $\pm$ 1.46              | 52,055     | 67                  | 23.04              |
| Kingwood West              | MG           | 0.61 $\pm$ 0.20              | 2,589      | 236                 | 2.6                |
| MUD#203                    | 203          | 0.38 $\pm$ 0.12              | 4,010      | 95                  | 2.57               |
| Metro Central              | MC           | 1.99 $\pm$ 1.64              | 20,161     | 99                  | 9.86               |
| Northbelt                  | NO           | 2.37 $\pm$ 1.49              | 12,892     | 184                 | 15.79              |
| Northeast                  | NE           | 3.88 $\pm$ 4.25              | 33,102     | 117                 | 14.41              |
| Northgate                  | NG           | 2.75 $\pm$ 1.03              | 19,867     | 138                 | 3.6                |
| Northwest                  | NW           | 9.99 $\pm$ 5.84              | 95,600     | 104                 | 22.62              |
| Park Ten                   | PT           | 0.62 $\pm$ 0.31              | 5,497      | 113                 | 2.19               |
| Sagemont                   | SG           | 4.52 $\pm$ 3.49              | 20,608     | 219                 | 5.9                |
| Sims Bayou South*          | SS           | 23.93 $\pm$ 18.22            | 109,414    | 219                 | 47.84              |
| Sims Bayou North*          | SB           | 8.22 $\pm$ 7.54              | 109,414    | 75                  | 47.84              |
| Southeast                  | SE           | 4.88 $\pm$ 4.85              | 32,485     | 150                 | 9.06               |
| Southwest                  | SW           | 37.59 $\pm$ 26.39            | 293,227    | 128                 | 38.72              |
| Tidwell Timbers            | TT           | 0.11 $\pm$ 0.06              | 1,133      | 97                  | 0.57               |

|               |     |                            |                  |                                    |            |
|---------------|-----|----------------------------|------------------|------------------------------------|------------|
| Turkey Creek  | TC  | 7.00 ± 4.85                | 59,188           | 118                                | 10.46      |
| Upper Brays   | UB  | 10.33 ± 7.44               | 97,918           | 105                                | 12.81      |
| WCID#111      | 111 | 2.24 ± 0.28                | 20,920           | 107                                | 3.35       |
| WCID#47       | 47  | 3.36 ± 2.28                | 33,645           | 100                                | 6.27       |
| WCID#76       | 76  | 0.37 ± 0.22                | 976              | 379                                | 0.5        |
| West District | WD  | 10.06 ± 6.62               | 85,129           | 118                                | 17.86      |
| West Lake     | WL  | 0.20 ± 0.07                | 600              | 333                                | 0.53       |
| Westway       | WW  | 0.40 ± 0.18                | 3,623            | 110                                | 0.99       |
| White Oak     | WO  | 1.84 ± 0.91                | 20,758           | 89                                 | 3.31       |
| Willowbrook   | WB  | 1.28 ± 0.52                | 8,610            | 149                                | 3.01       |
| <b>TOTAL</b>  |     | <b>272.23 ±<br/>159.04</b> | <b>2,168,563</b> | <b>162 ± 133 (AVG ±<br/>STDEV)</b> | <b>532</b> |

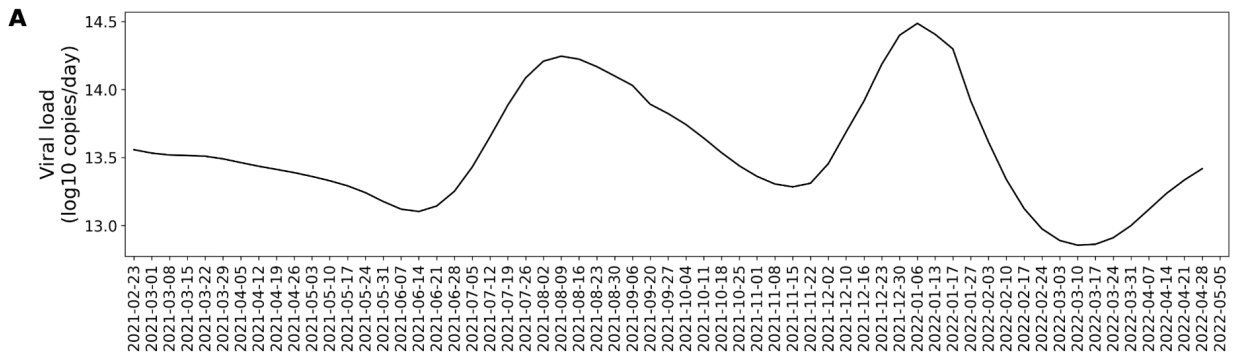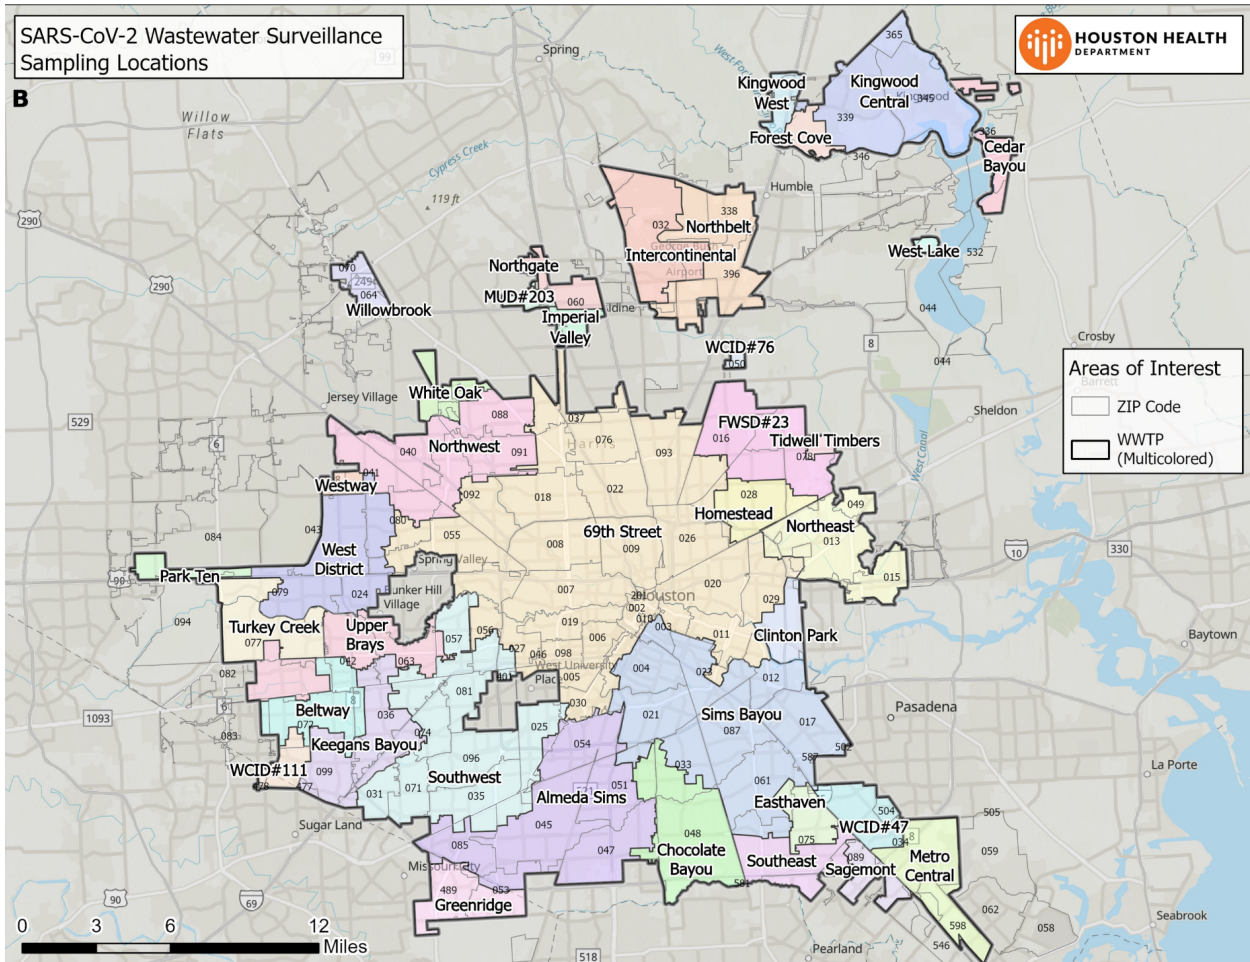

**Supplementary Figure 1. A.** Estimated viral load in Houston wastewater in log-scale of viral copies per day. Trend in viral load matches up with the variant associated waves of infection. **B.** Map of the sewersheds and wastewater treatment plants in the city of Houston.

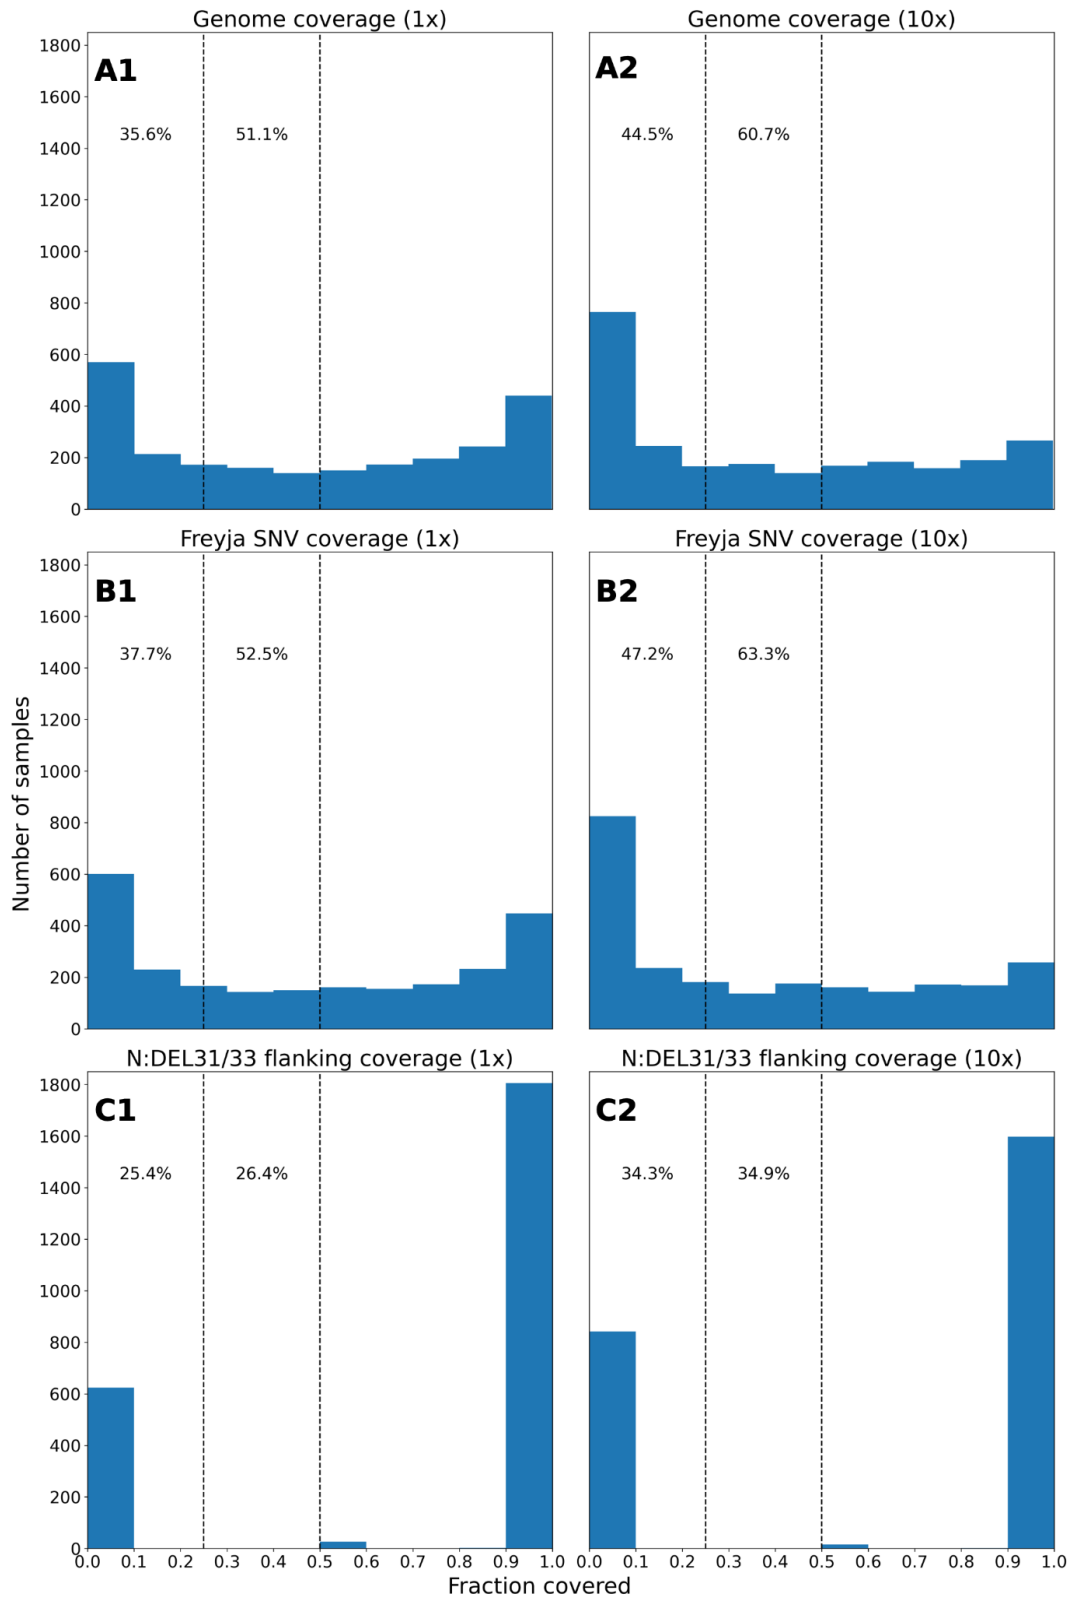

**Supplementary Figure 2. A1, 2.** Histogram of the coverage breadth statistics with respect to the Wuhan reference genome. Cumulative percentage of samples with coverage breadth up to 25% (35.6%/44.5% of all samples) and 50% (51.1%/60.7% of all samples) is noted above the histogram. **B1, 2.** Histogram of the fraction of the SNVs used by Freyja to detect Omicron VoC that have coverage. Cumulative percentage of samples with coverage fraction up to 25% (37.7%/52.5% of all samples) and 50% (47.2%/63.3% of all samples) is noted above the histogram. **C1, 2.** Histogram of the fraction of the flanking positions (6 in total) for the N:DEL31/33 that have coverage. Cumulative percentage of samples with coverage fraction up to 25% (25.4%/26.4% of all samples) and 50% (34.3%/34.9% of all samples) is noted above the histogram.

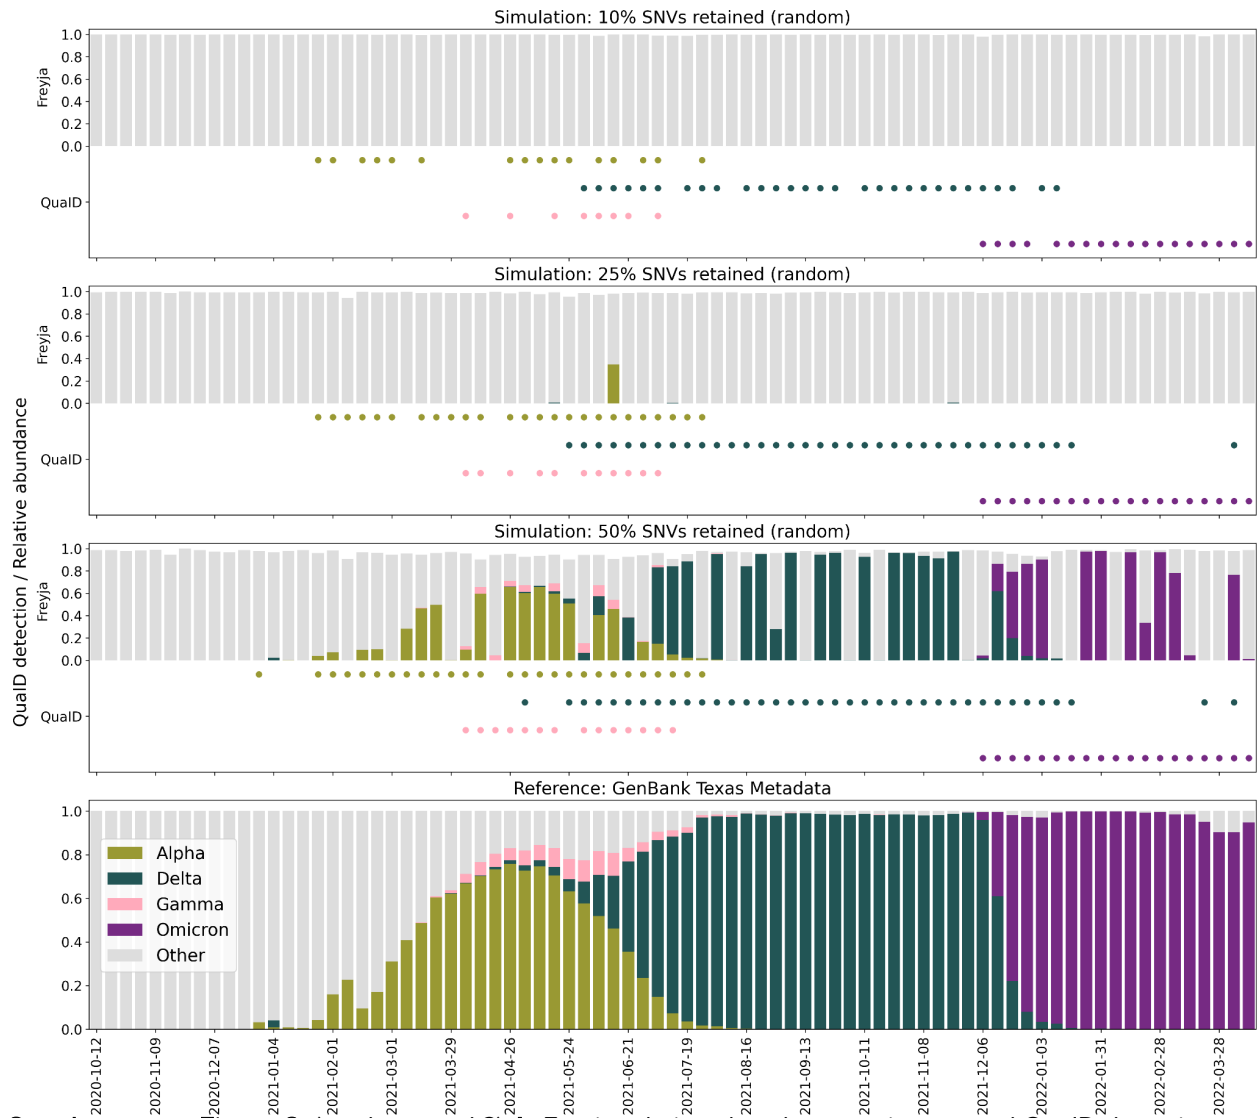

**Supplementary Figure 3.** (random seed 3) **A.** Freyja relative abundance estimates and QualD detection signal on simulated data from GenBank (USA/TX) with 10% of all SNVs retained at random. Freyja is unable to detect any of the four (Alpha, Delta, Gamma, Omicron) VoCs. QualD detection is sparse, in particular for the Gamma variant. **B.** Freyja relative abundance estimates and QualD detection signal on simulated data from GenBank (USA/TX) with 25% of all SNVs retained at random. Freyja sparsely detects major VoCs (Delta, Omicron). QualD detections become less sparse for all VoCs. **C.** Freyja relative abundance estimates and QualD detection signal on simulated data from GenBank (USA/TX) with 50% of all SNVs retained at random. Freyja detections become dense, and in some cases abundance estimates correctly reflect simulated abundance profiles. QualD remains highly sensitive with respect to early detection. **D.** Metadata from GenBank (USA/TX) showing the fraction of genomes belonging to different VoCs for any given week. In this simulated experiment the fractions shown correspond to true relative abundances in the simulated mixture.

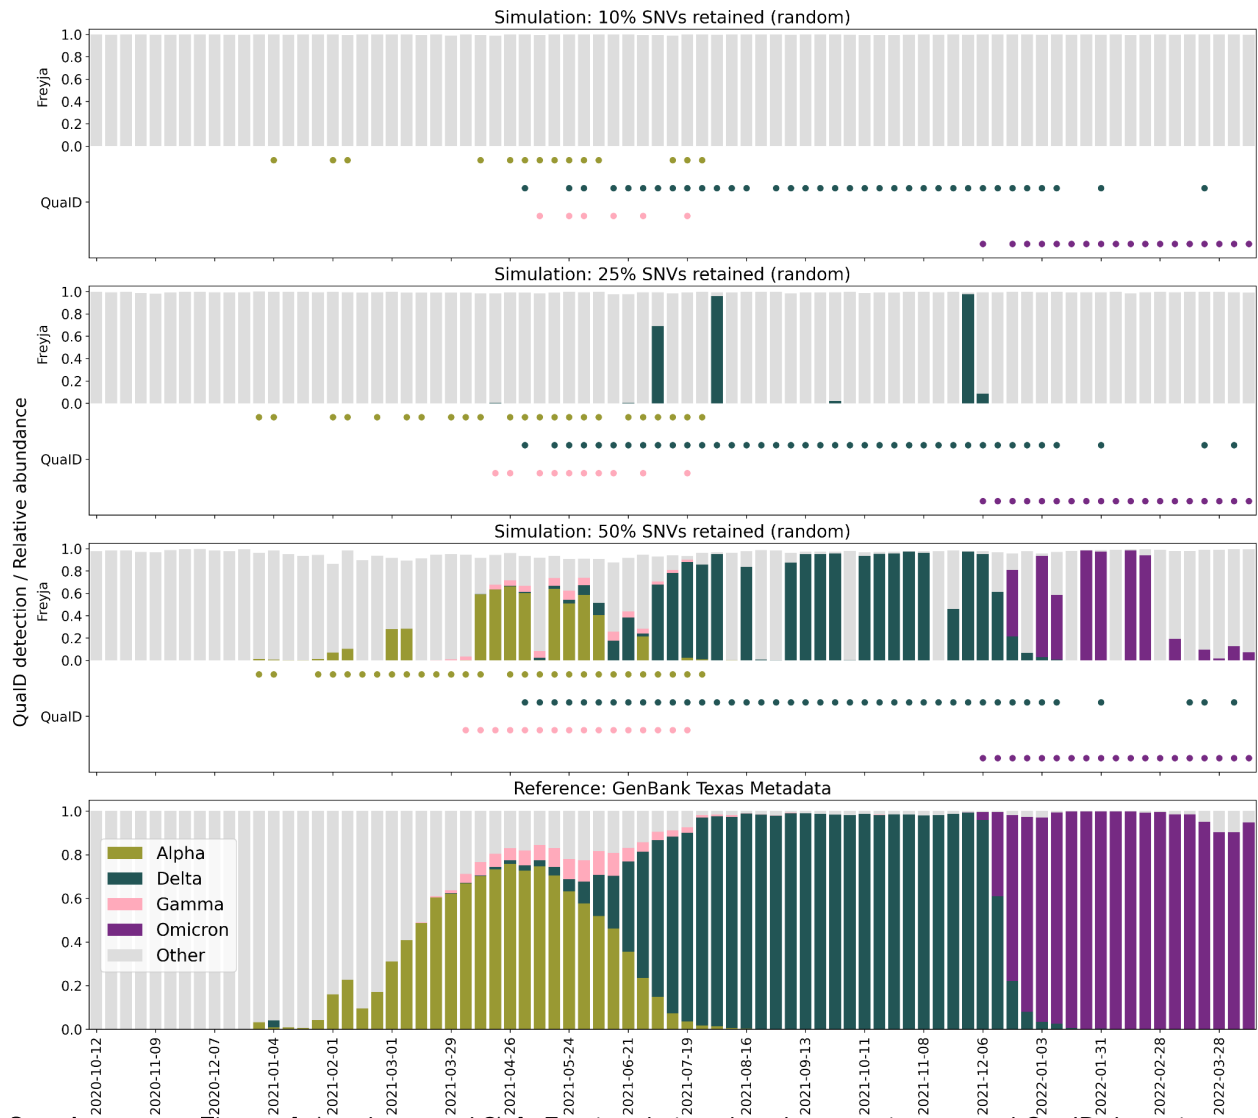

**Supplementary Figure 4.** (random seed 8) **A.** Freyja relative abundance estimates and QualD detection signal on simulated data from GenBank (USA/TX) with 10% of all SNVs retained at random. Freyja is unable to detect any of the four (Alpha, Delta, Gamma, Omicron) VoCs. QualD detection is sparse, in particular for the Gamma variant. **B.** Freyja relative abundance estimates and QualD detection signal on simulated data from GenBank (USA/TX) with 25% of all SNVs retained at random. Freyja sparsely detects major VoCs (Delta, Omicron). QualD detections become less sparse for all VoCs. **C.** Freyja relative abundance estimates and QualD detection signal on simulated data from GenBank (USA/TX) with 50% of all SNVs retained at random. Freyja detections become dense, and in some cases abundance estimates correctly reflect simulated abundance profiles. QualD remains highly sensitive with respect to early detection. **D.** Metadata from GenBank (USA/TX) showing the fraction of genomes belonging to different VoCs for any given week. In this simulated experiment the fractions shown correspond to true relative abundances in the simulated mixture.

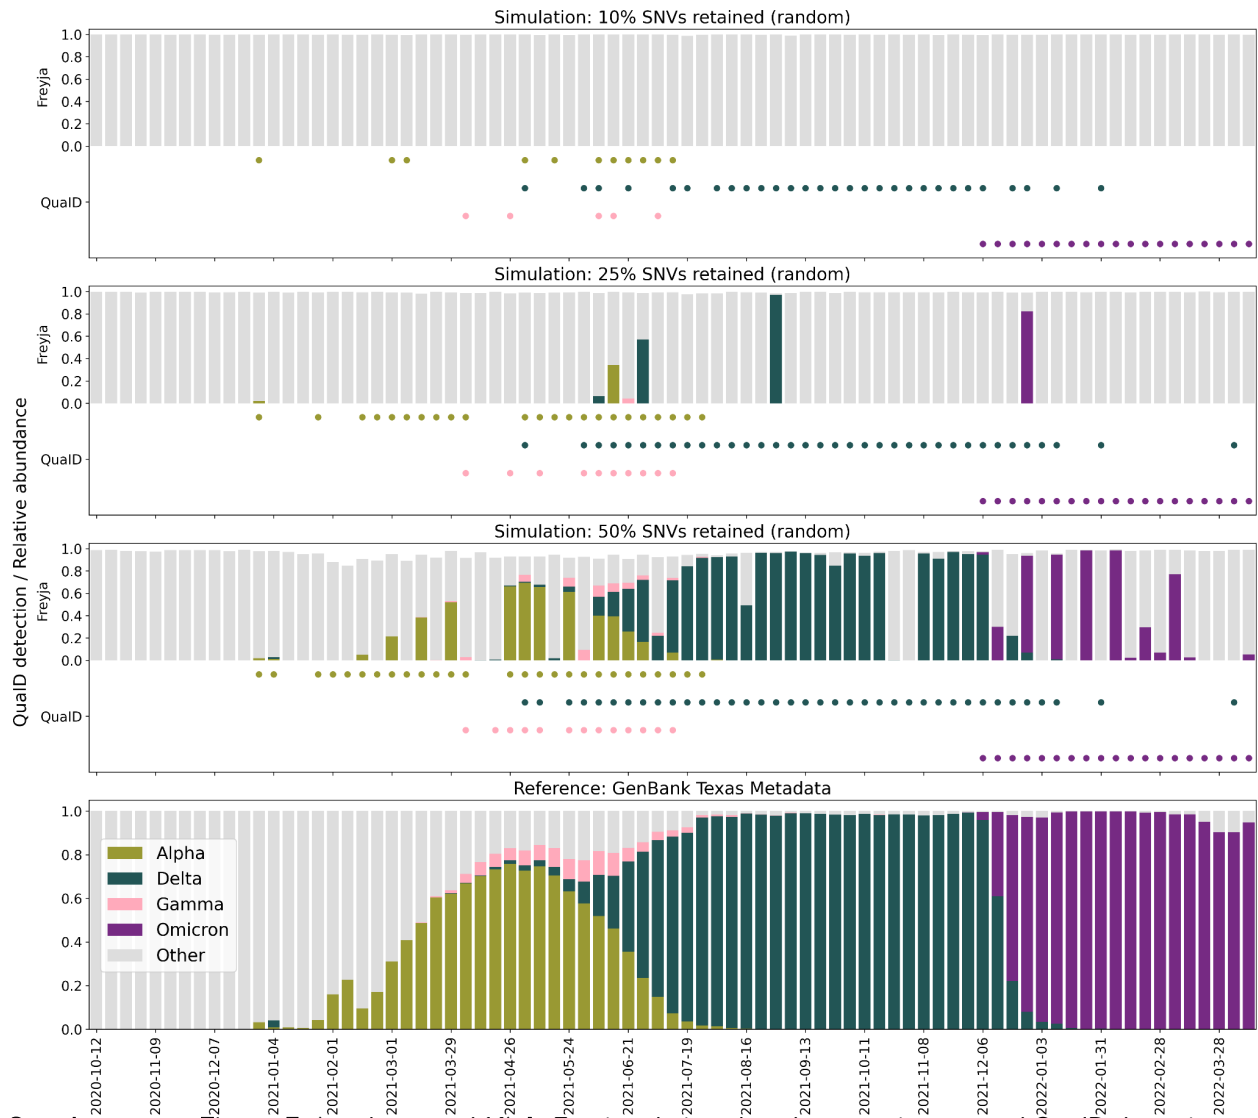

**Supplementary Figure 5.** (random seed 14) **A.** Freyja relative abundance estimates and QualID detection signal on simulated data from GenBank (USA/TX) with 10% of all SNVs retained at random. Freyja is unable to detect any of the four (Alpha, Delta, Gamma, Omicron) VoCs. QualID detection is sparse, in particular for the Gamma variant. **B.** Freyja relative abundance estimates and QualID detection signal on simulated data from GenBank (USA/TX) with 25% of all SNVs retained at random. Freyja sparsely detects major VoCs (Delta, Omicron). QualID detections become less sparse for all VoCs. **C.** Freyja relative abundance estimates and QualID detection signal on simulated data from GenBank (USA/TX) with 50% of all SNVs retained at random. Freyja detections become dense, and in some cases abundance estimates correctly reflect simulated abundance profiles. QualID remains highly sensitive with respect to early detection. **D.** Metadata from GenBank (USA/TX) showing the fraction of genomes belonging to different VoCs for any given week. In this simulated experiment the fractions shown correspond to true relative abundances in the simulated mixture.

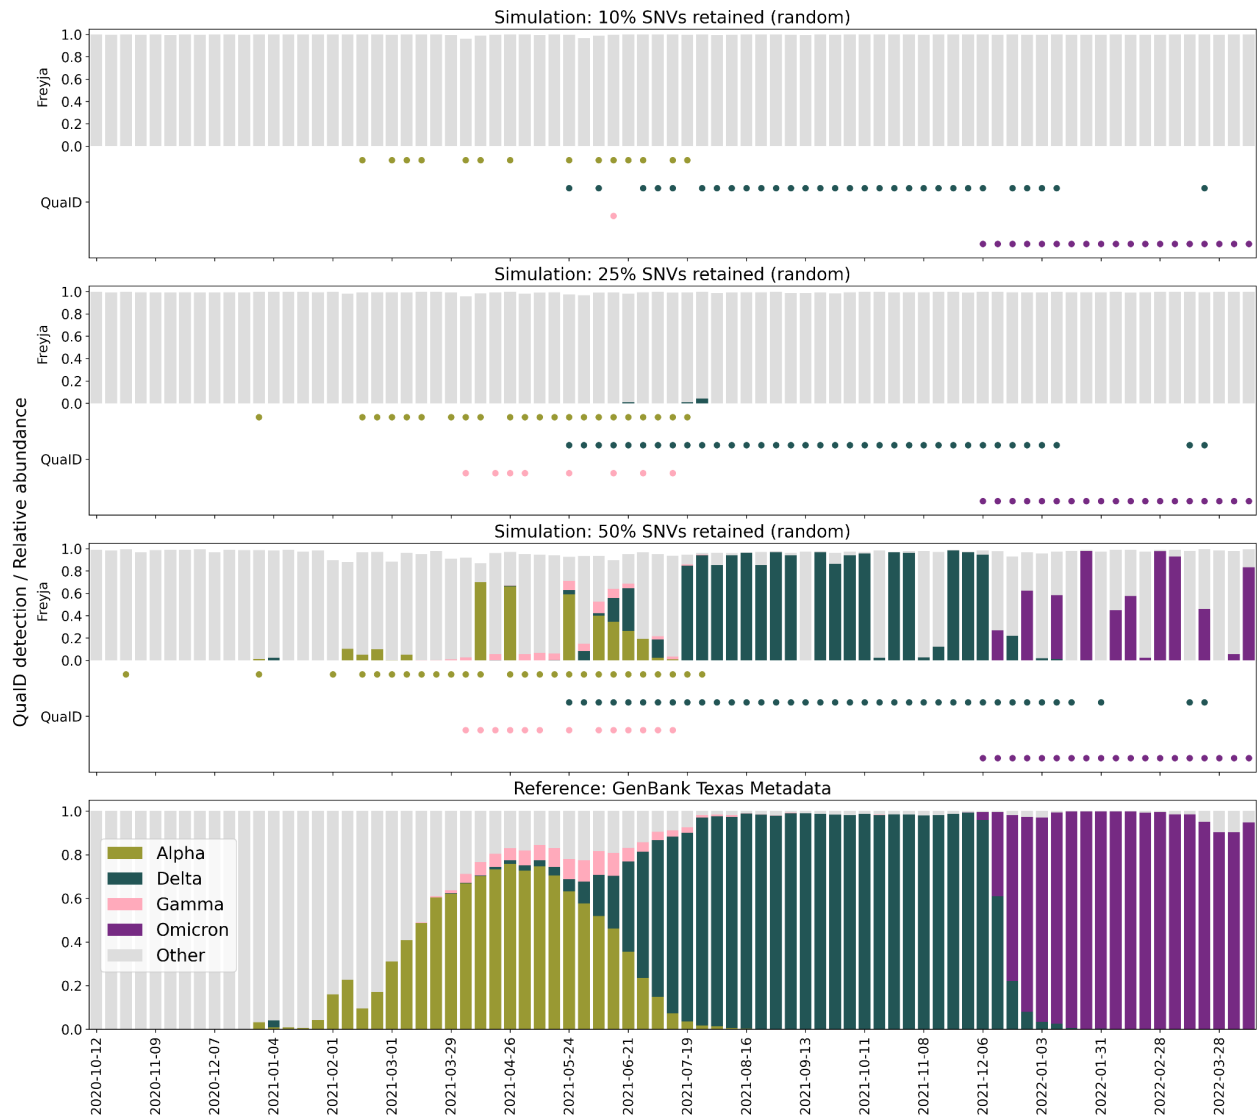

**Supplementary Figure 6.** (random seed 42) **A.** Freyja relative abundance estimates and QualD detection signal on simulated data from GenBank (USA/TX) with 10% of all SNVs retained at random. Freyja is unable to detect any of the four (Alpha, Delta, Gamma, Omicron) VoCs. QualD detection is sparse, in particular for the Gamma variant. **B.** Freyja relative abundance estimates and QualD detection signal on simulated data from GenBank (USA/TX) with 25% of all SNVs retained at random. Freyja sparsely detects major VoCs (Delta, Omicron). QualD detections become less sparse for all VoCs. **C.** Freyja relative abundance estimates and QualD detection signal on simulated data from GenBank (USA/TX) with 50% of all SNVs retained at random. Freyja detections become dense, and in some cases abundance estimates correctly reflect simulated abundance profiles. QualD remains highly sensitive with respect to early detection. **D.** Metadata from GenBank (USA/TX) showing the fraction of genomes belonging to different VoCs for any given week. In this simulated experiment the fractions shown correspond to true relative abundances in the simulated mixture.
